# Supplementary material
Source: PubMed Central journal article supplement (PMC3891507)

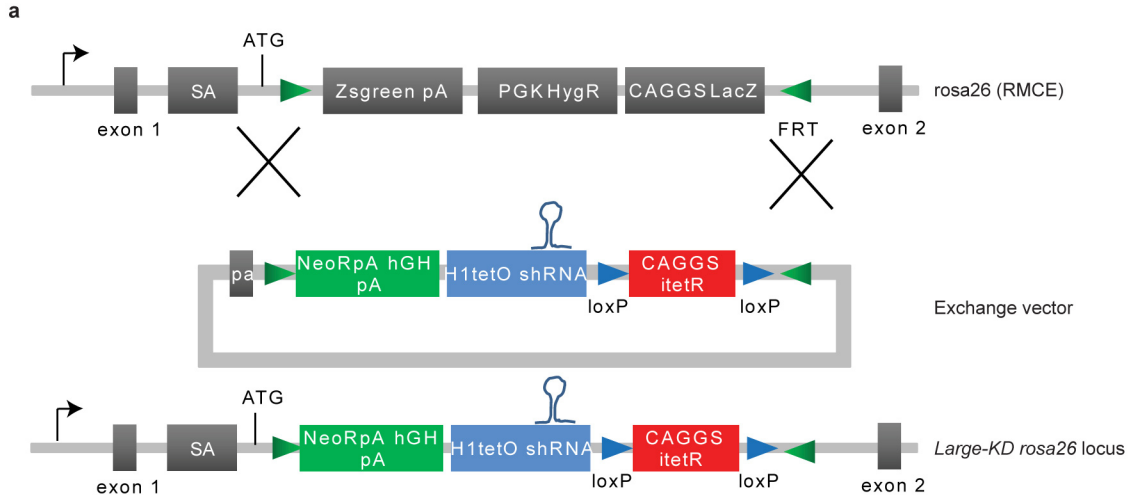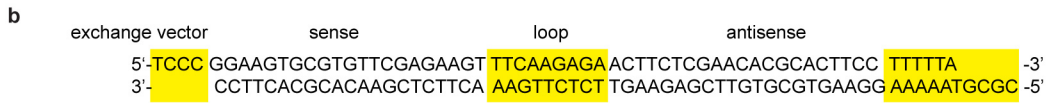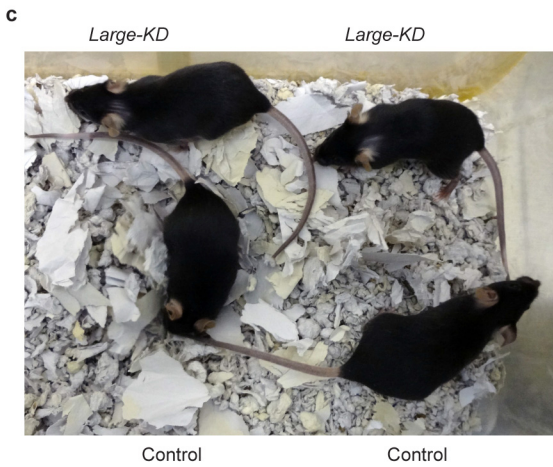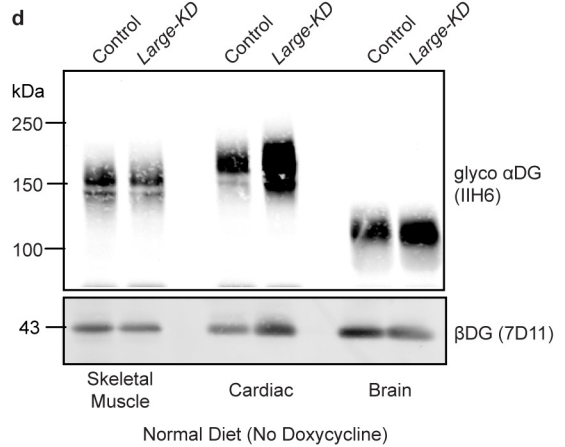

Supplement: NIHMS532911-supplement-ED_Fig_1.pdf [file NIHMS532911-supplement-ED_Fig_1.pdf]

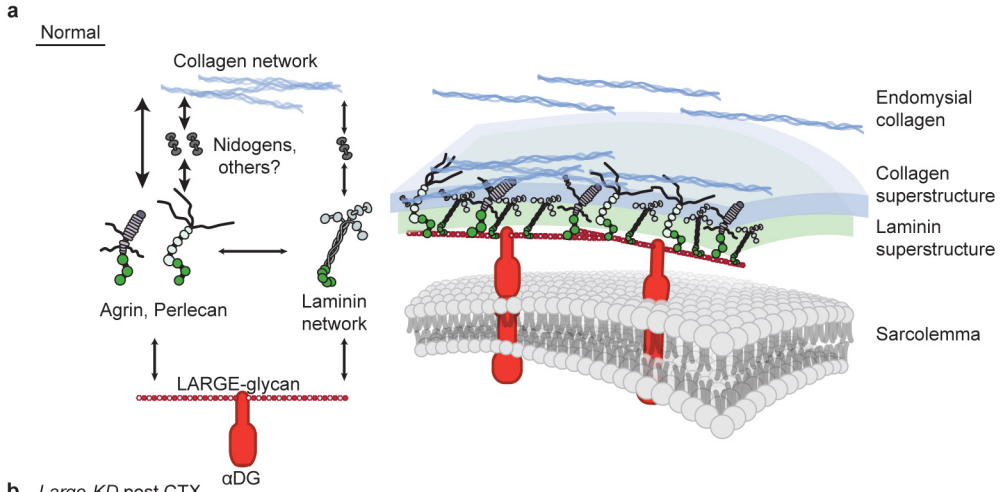

**b** Large-KD post CTX, Severe-moderate dystroglycanopathies

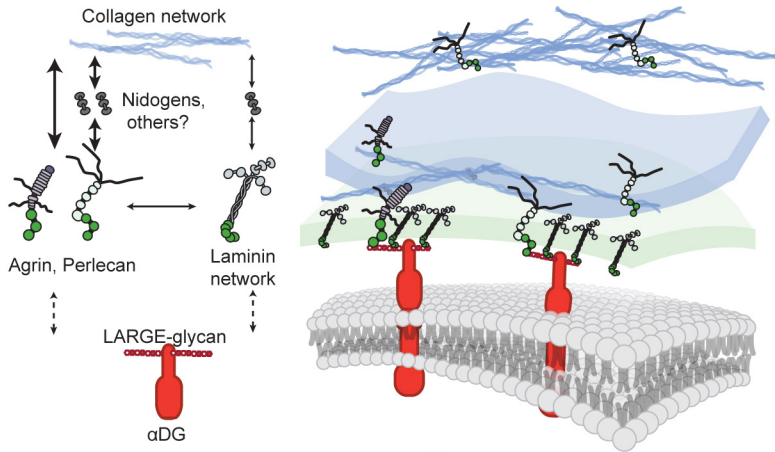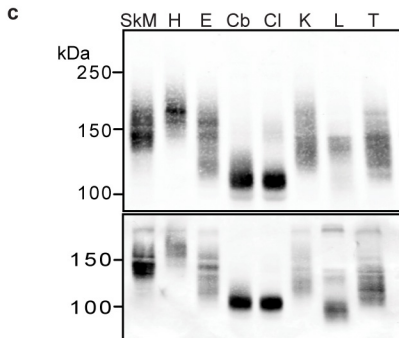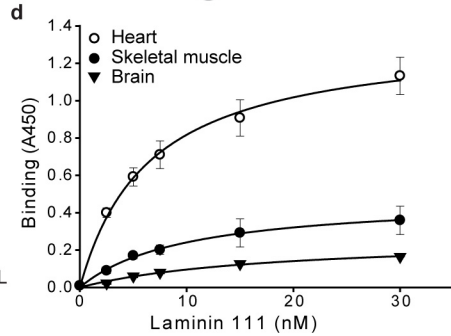

Supplement: NIHMS532911-supplement-ED_Fig_10.pdf [file NIHMS532911-supplement-ED_Fig_10.pdf]

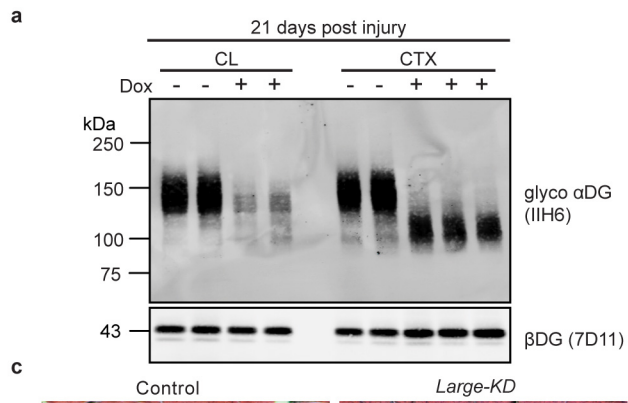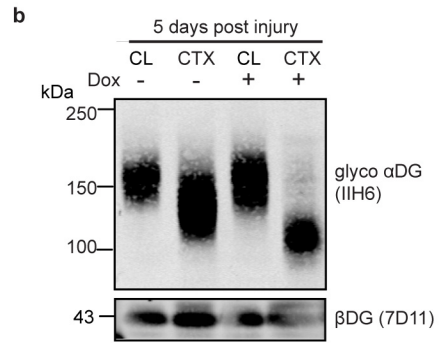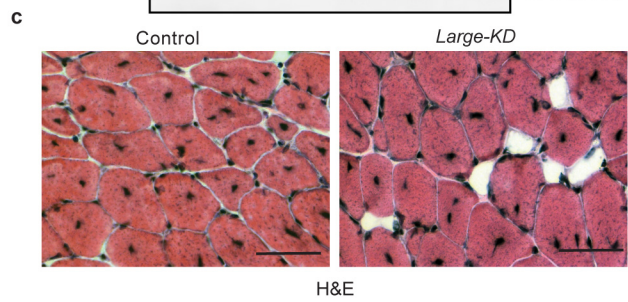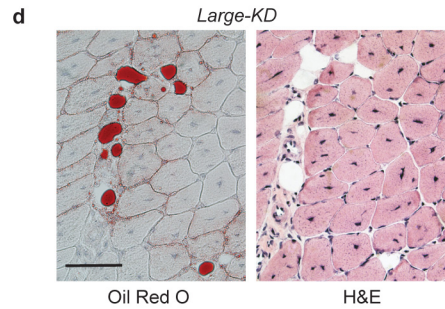

Supplement: NIHMS532911-supplement-ED_Fig_2.pdf [file NIHMS532911-supplement-ED_Fig_2.pdf]

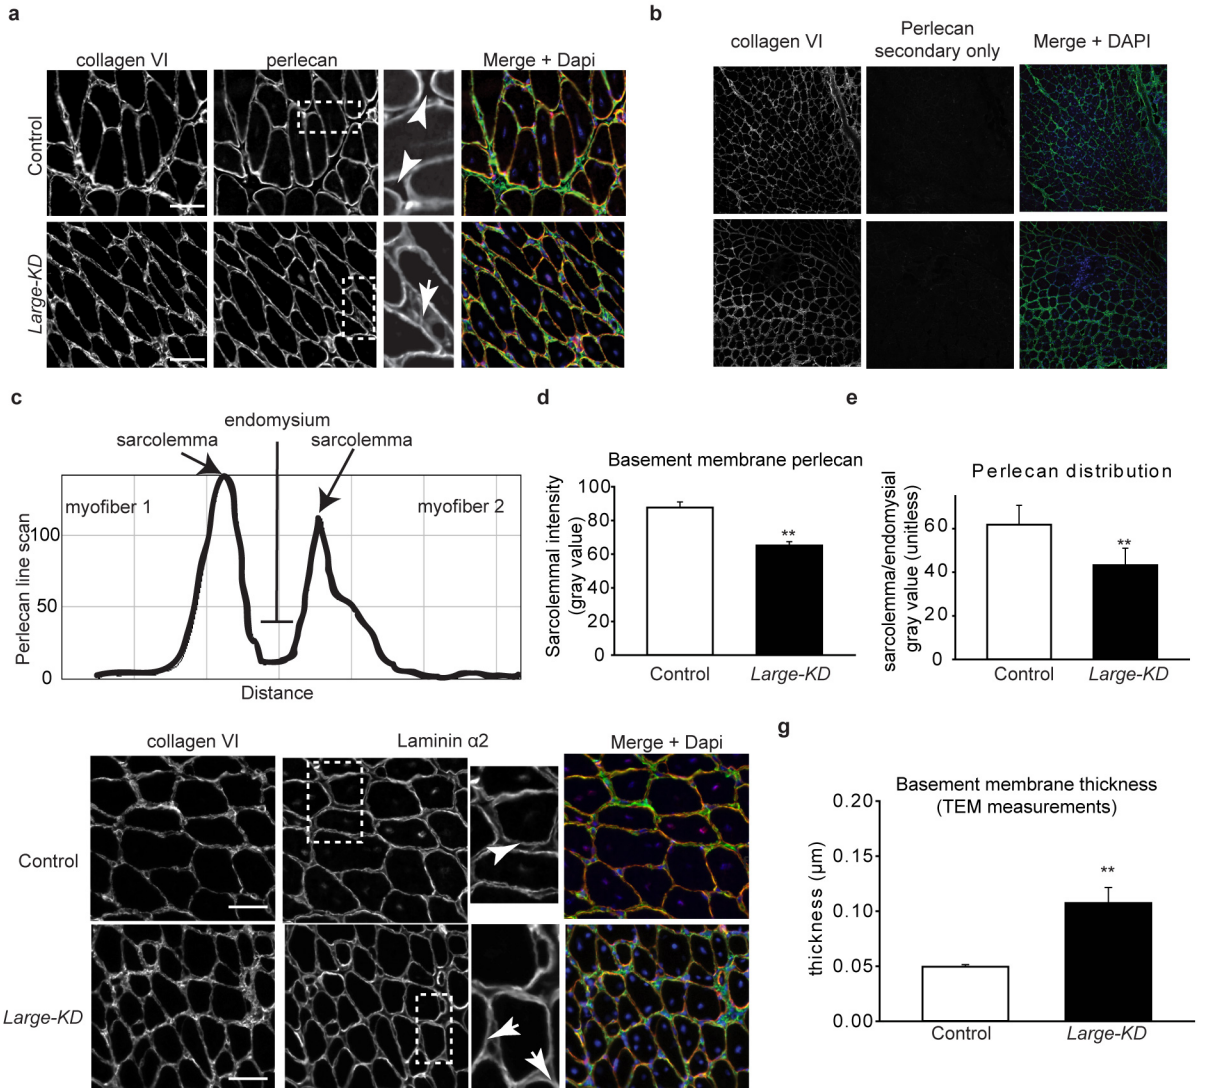

Supplement: NIHMS532911-supplement-ED_Fig_3.pdf [file NIHMS532911-supplement-ED_Fig_3.pdf]

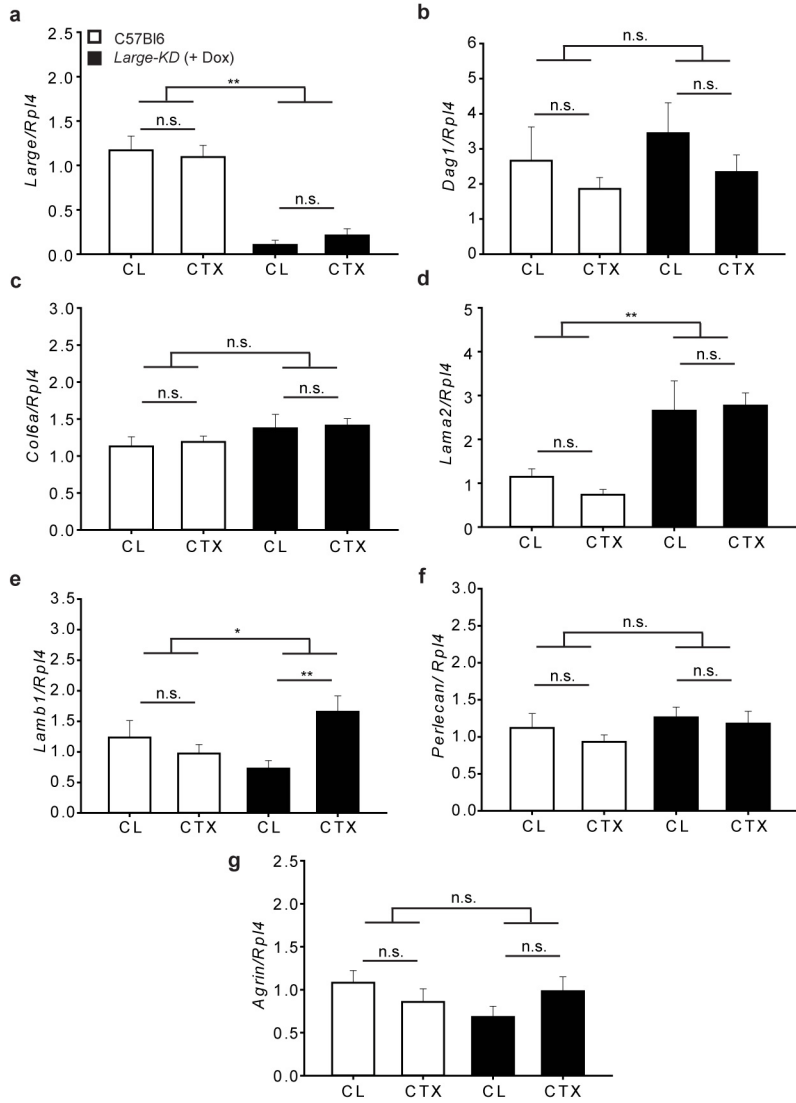

Supplement: NIHMS532911-supplement-ED_Fig_4.pdf [file NIHMS532911-supplement-ED_Fig_4.pdf]

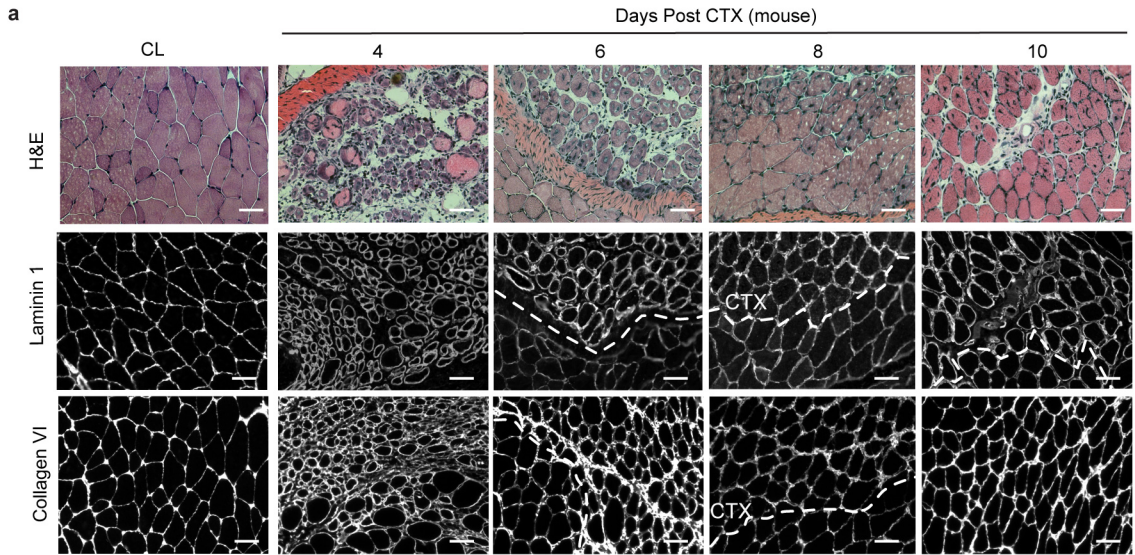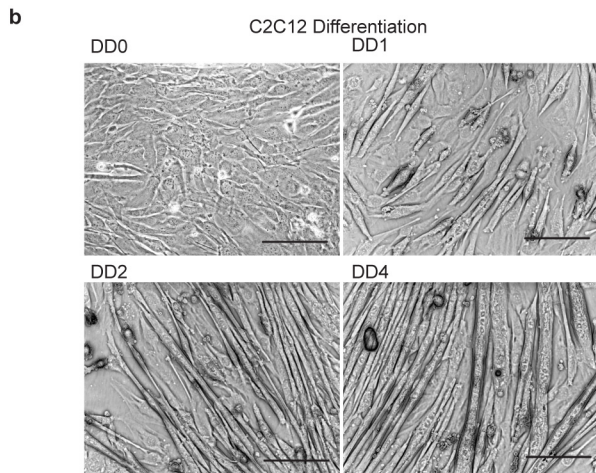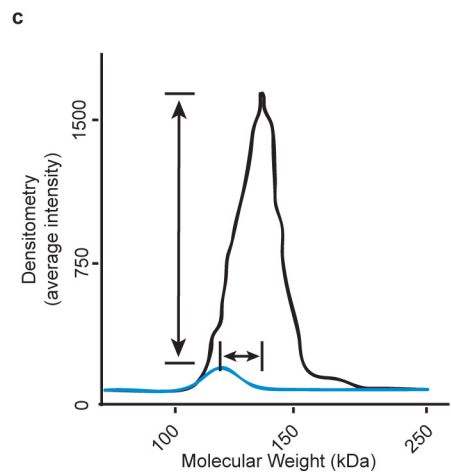

Supplement: NIHMS532911-supplement-ED_Fig_5.pdf [file NIHMS532911-supplement-ED_Fig_5.pdf]

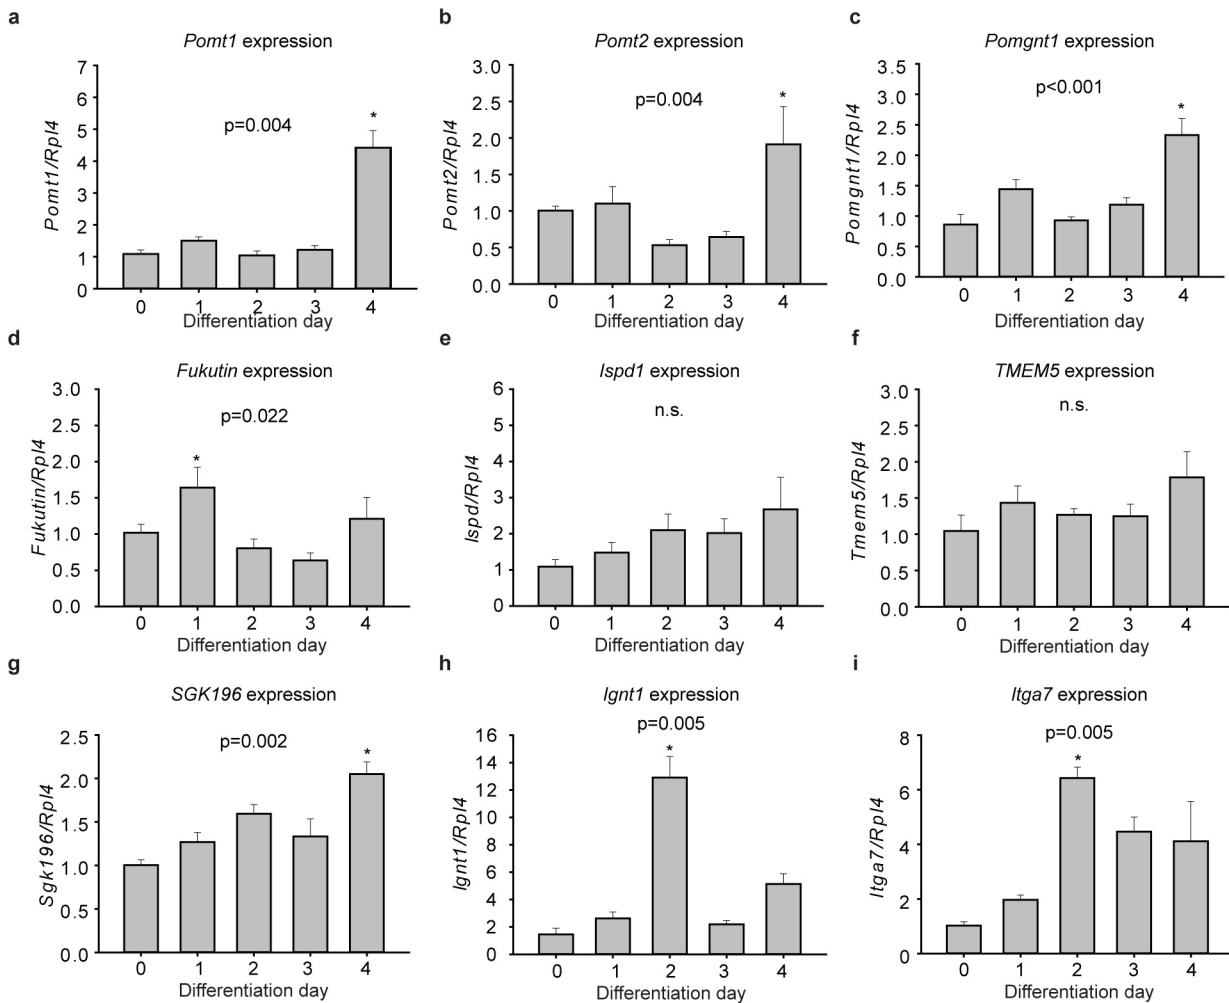

Supplement: NIHMS532911-supplement-ED_Fig_6.pdf [file NIHMS532911-supplement-ED_Fig_6.pdf]

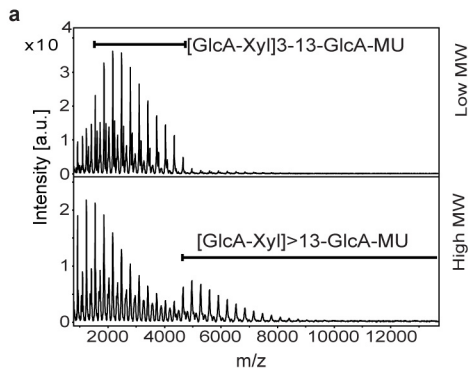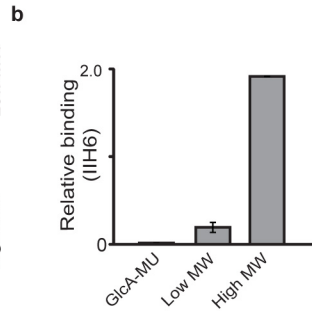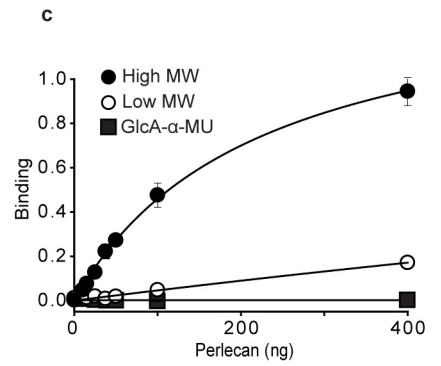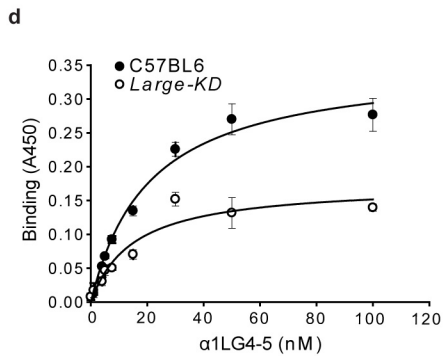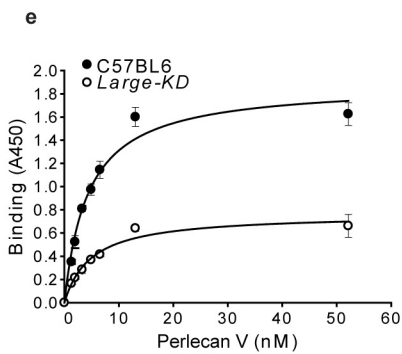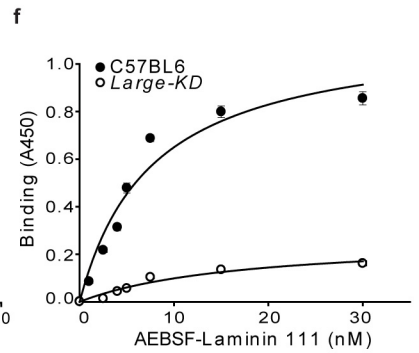

Supplement: NIHMS532911-supplement-ED_Fig_7.pdf [file NIHMS532911-supplement-ED_Fig_7.pdf]

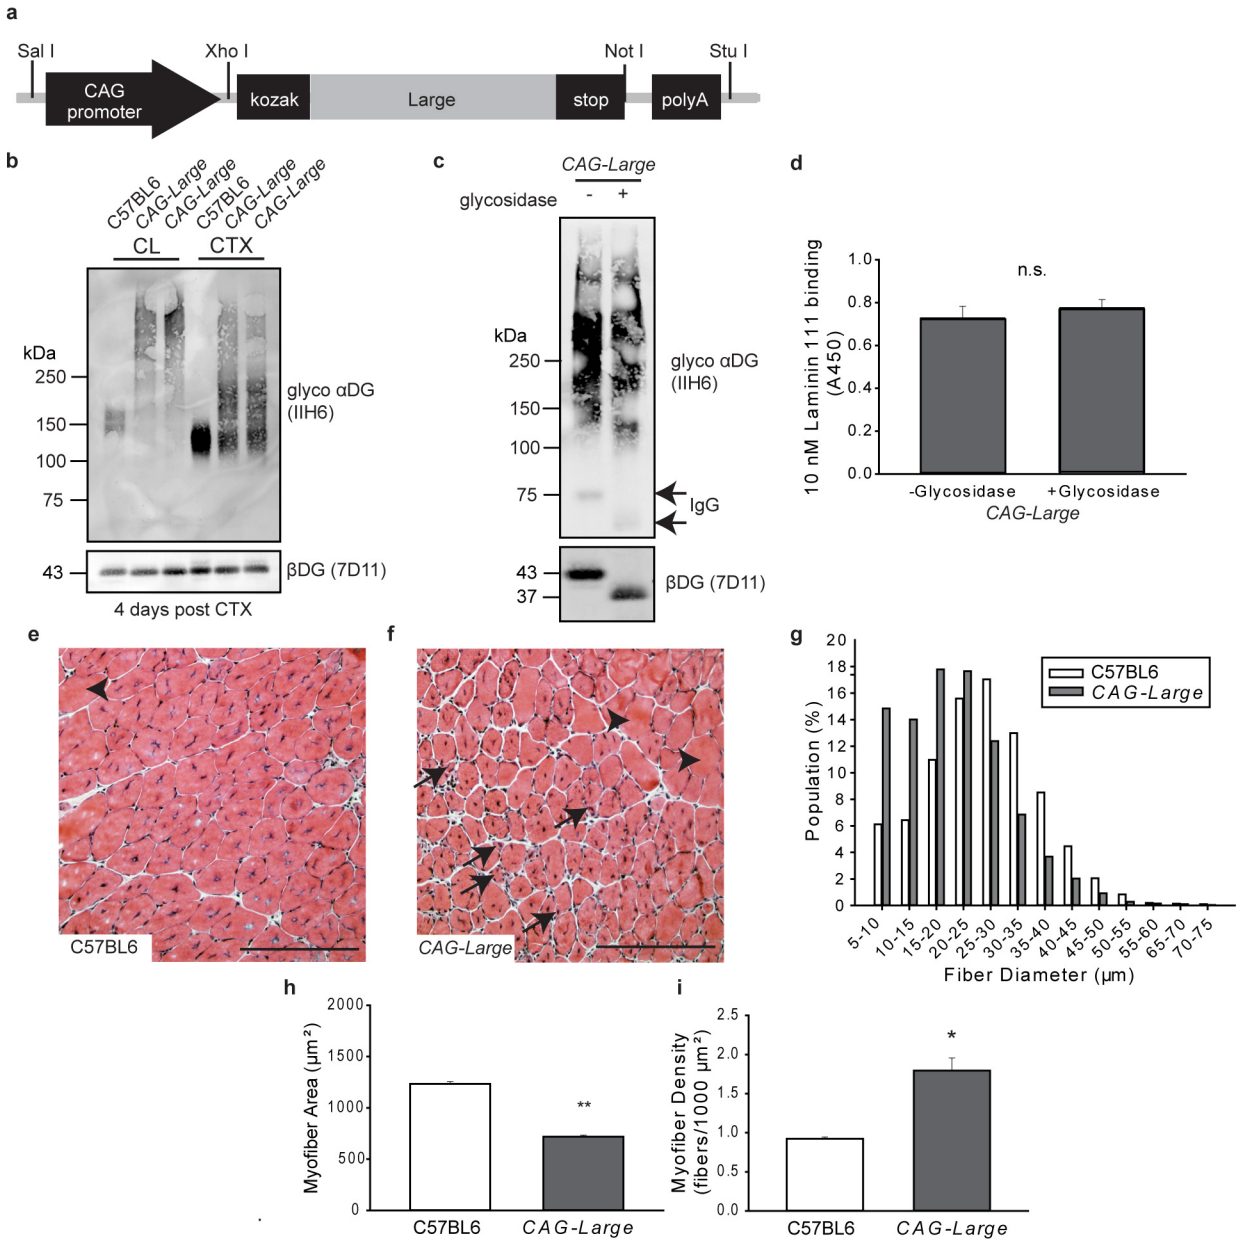

Supplement: NIHMS532911-supplement-ED_Fig_8.pdf [file NIHMS532911-supplement-ED_Fig_8.pdf]

**a**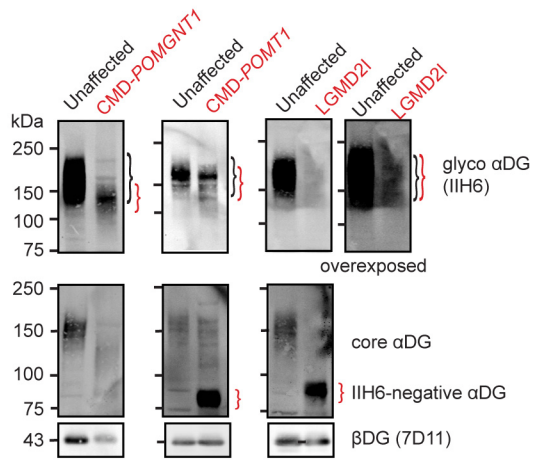**b**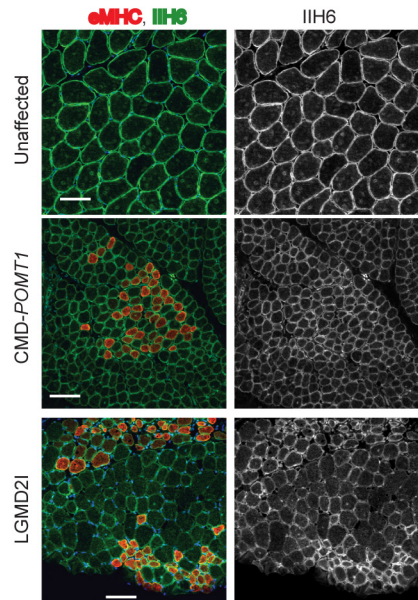**c**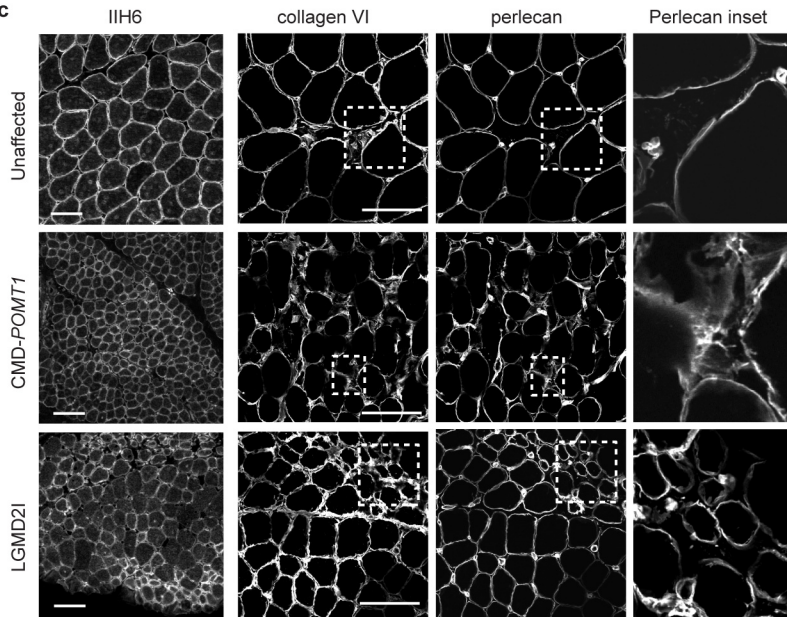**d**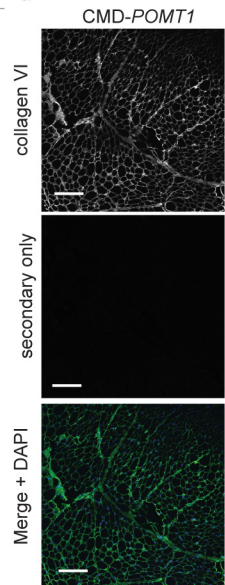

Supplement: NIHMS532911-supplement-ED_Fig_9.pdf [file NIHMS532911-supplement-ED_Fig_9.pdf]
